# Supplementary material
Source: PubMed Central journal article supplement (PMC7698658)
Supplement: Supp_FigS2.pdf [file Supp_FigS2.pdf]

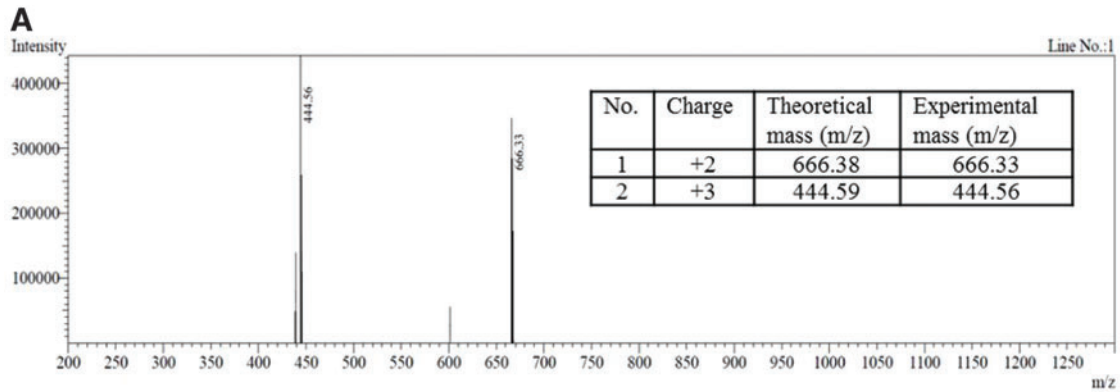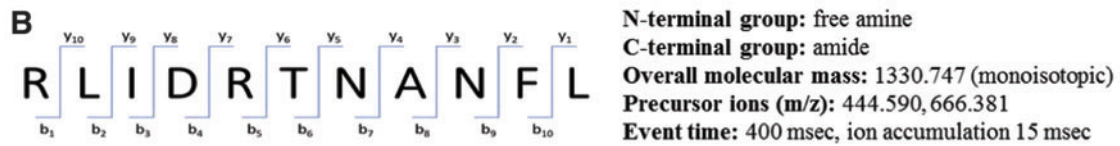

**C**

| Ion                        | Theoretical mass of the fragment (Da) | Theoretical mass (m/z) | Experimental mass (m/z) | Charge | Error (ppm) | Sequence    |
|----------------------------|---------------------------------------|------------------------|-------------------------|--------|-------------|-------------|
| MH-NH <sub>3</sub>         | 1314,728                              | 657,868                | 657,853                 | +2     | -23         | RLIDRTNANFL |
| $b_{10}$                   | 1201,644                              | 601,326                | 601,306                 | +2     | -33         | RLIDRTNANF  |
| $b_{10}$ -NH <sub>3</sub>  | 1184,617                              | 592,812                | 592,792                 | +2     | -34         | RLIDRTNANF  |
| $Y_{10}$ -H <sub>2</sub> O | 1157,643                              | 579,325                | 579,296                 | +2     | -50         | LIDRTNANFL  |
| $b_9$                      | 1054,575                              | 527,791                | 527,773                 | +2     | -34         | RLIDRTNAN   |
| $b_9$ -NH <sub>3</sub>     | 1039,549                              | 519,278                | 519,260                 | +2     | -35         | RLIDRTNAN   |
| $b_7$                      | 869,495                               | 435,251                | 435,236                 | +2     | -34         | RLIDRTN     |
| $y_7$                      |                                       | 834,458                | 834,426                 | +1     | -38         | RTNANFL     |
| $y_7$ -NH <sub>3</sub>     |                                       | 817,432                | 817,400                 | +1     | -39         | RTNANFL     |
| $b_4$                      |                                       | 498,304                | 498,286                 | +1     | -36         | RLID        |
| $b_4$ -NH <sub>3</sub>     |                                       | 481,277                | 481,258                 | +1     | -39         | RLID        |
| $b_3$                      |                                       | 383,277                | 383,262                 | +1     | -39         | RLI         |
| $b_3$ -NH <sub>3</sub>     |                                       | 253,166                | 253,157                 | +1     | -36         | RL          |

**Supplementary Figure S2.** Mass spectrometry analysis of PDGF2 peptide: **(A)** ESI chromatogram of detected ions, **(B)** theoretical fragments of PDGF2 generated by CID, and **(C)** fragments detected during the MS/MS experiment. Identification of PDGF2 was performed using tandem Shimadzu LC-MS IT-TOF. Pure peptide was loaded on column packed with Kromasil C8, 100 Å, 5 μm 250 × 1.0 mm and separated by linear gradient using 0.2% formic acid in water as starting and 100% acetonitrile as ending solvent (0.08 mL/min). Following MS<sup>2</sup> analysis, b and y ions of peptide were detected. The following experimental parameters were used: ion spray voltage was set at 1.7 kV, nebulizing gas flow at 1.5 L/min, and an interface heater temperature setting of 200°C. MS/MS switch criteria included precursor ions according to peptide. Data were analyzed with Shimadzu LCMS solution v3.8 software. A cutoff of 10% of intensity was applied, and the filtered data set was further analyzed manually. The following protein search parameters were used: MS tolerance 10 ppm, MS/MS tolerance 100 ppm, charge state +2–5.
