# Supplementary material
Source: PubMed Central journal article supplement (PMC7698658)
Supplement: Supp_FigS3.pdf [file Supp_FigS3.pdf]

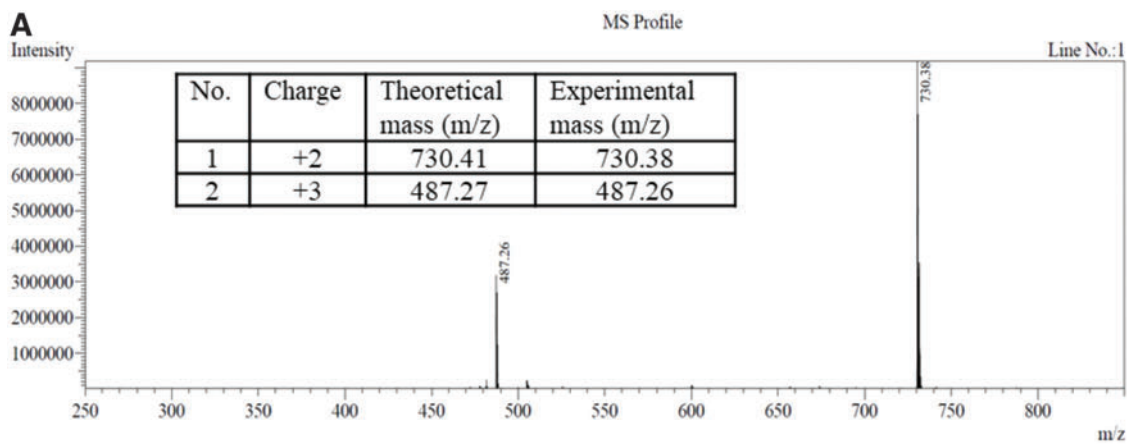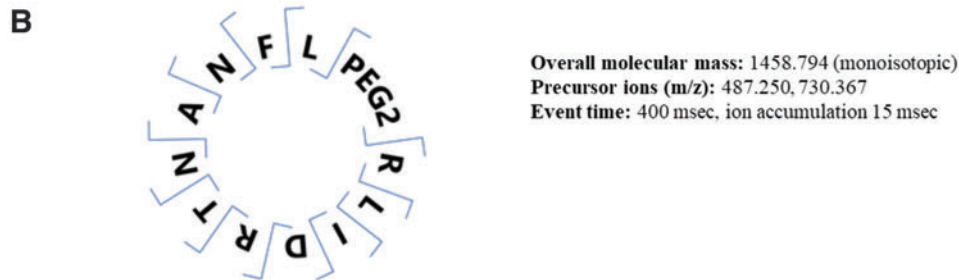

**C**

| Theoretical mass (m/z) | Experimental mass (m/z) | Charge | Error (ppm) | Sequence                | Comments     |
|------------------------|-------------------------|--------|-------------|-------------------------|--------------|
| 817,432                | 817,399                 | +1     | -40         | RTNANFL                 |              |
| 687,321                | 687,309                 | +1     | -17         | RTNANF-NH <sub>3</sub>  | ammonia lost |
| 677,386                | 677,339                 | +1     | -69         | NFL-PEG2-R              |              |
| 643,320                | 643,345                 | +1     | 39          | TNANFL-H <sub>2</sub> O | water lost   |
| 599,351                | 599,303                 | +1     | -80         | LIDRT                   |              |
| 557,279                | 557,260                 | +1     | -34         | RTNAN                   |              |
| 541,237                | 541,223                 | +1     | -26         | DRTNA-NH <sub>3</sub>   | ammonia lost |
| 540,253                | 540,233                 | +1     | -37         | DRTNA-H <sub>2</sub> O  | water lost   |
| 540,253                | 540,233                 | +1     | -37         | RTNAN-NH <sub>3</sub>   | ammonia lost |
| 539,269                | 539,254                 | +1     | -28         | RTNAN-H <sub>2</sub> O  | water lost   |
| 530,366                | 530,366                 | +1     | 0           | PEG2-RLI                |              |
| 530,236                | 530,255                 | +1     | 36          | TNANF-H <sub>2</sub> O  | water lost   |
| 469,205                | 469,231                 | +1     | 55          | IDRT-NH <sub>3</sub>    | ammonia lost |
| 468,257                | 468,242                 | +1     | -32         | IDRT-H <sub>2</sub> O   | water lost   |
| 443,236                | 443,220                 | +1     | -36         | RTNA                    |              |
| 426,210                | 426,196                 | +1     | -33         | RTNA-NH <sub>3</sub>    | ammonia lost |
| 425,226                | 425,216                 | +1     | -24         | RTNA-H <sub>2</sub> O   | water lost   |
| 398,224                | 398,220                 | +1     | -10         | L-PEG2-R                |              |
| 384,151                | 384,155                 | +1     | 10          | TNAN-NH <sub>3</sub>    | ammonia lost |
| 383,167                | 383,188                 | +1     | 55          | TNAN-H <sub>2</sub> O   | water lost   |
| 373,183                | 373,217                 | +1     | 91          | DRT                     |              |
| 372,199                | 372,187                 | +1     | -32         | RTN                     |              |
| 356,157                | 356,177                 | +1     | 56          | DRT-NH <sub>3</sub>     | ammonia lost |
| 355,172                | 355,173                 | +1     | 3           | DRT-H <sub>2</sub> O    | water lost   |
| 354,188                | 354,189                 | +1     | 3           | RTN-H <sub>2</sub> O    | water lost   |
| 287,135                | 287,135                 | +1     | 0           | TNA                     |              |
| 283,104                | 283,109                 | +1     | 18          | NAN-NH <sub>3</sub>     | ammonia lost |
| 270,108                | 270,126                 | +1     | 67          | TNA-NH <sub>3</sub>     | ammonia lost |
| 269,124                | 269,128                 | +1     | 15          | TNA-H <sub>2</sub> O    | water lost   |
| 259,158                | 259,137                 | +1     | -81         | L-PEG2                  |              |
| 258,156                | 258,146                 | +1     | -39         | DR-H <sub>2</sub> O     | water lost   |
| 254,125                | 254,131                 | +1     | 24          | RT-NH <sub>3</sub>      | ammonia lost |
| 241,130                | 241,121                 | +1     | -37         | RT-H <sub>2</sub> O     | water lost   |
| 240,146                | 240,126                 | +1     | -83         | RT                      |              |

**Supplementary Figure S3.** Mass spectrometry analysis of PDGF2-HTT peptide: (A) ESI chromatogram of detected ions, (B) theoretical fragments of PDGF2-HTT generated by CID, ions "b" and "y" are not marked for clarity, and (C) fragments detected during the MS/MS experiment, ions "b" and "y" are not marked for clarity. Identification of PDGF2-HTT was performed using tandem Shimadzu LC-MS IT-TOF. Pure peptide was loaded on column packed with Kromasil C8, 100 Å, 5 μm 250 × 1.0 mm and separated by linear gradient using 0.2% formic acid in water as starting and 100% acetonitrile as ending solvent (0.08 mL/min). Following MS<sup>2</sup> analysis, b and y ions of peptide were detected. The following experimental parameters were used: ion spray voltage was set at 1.7 kV, nebulizing gas flow at 1.5 L/min, and an interface heater temperature setting of 200°C. MS/MS switch criteria included precursor ions according to peptide. Data were analyzed with Shimadzu LCMS solution v3.8 software. A cutoff of 10% of intensity was applied, and the filtered data set was further analyzed manually. The following protein search parameters were used: MS tolerance 10 ppm, MS/MS tolerance 100 ppm, charge state +2–5. HTT, head-to-tail cyclization methodology.
