# Supplementary material
Source: PubMed Central journal article supplement (PMC7698658)
Supplement: Supp_FigS4-S5.pdf [file Supp_FigS4-S5.pdf]

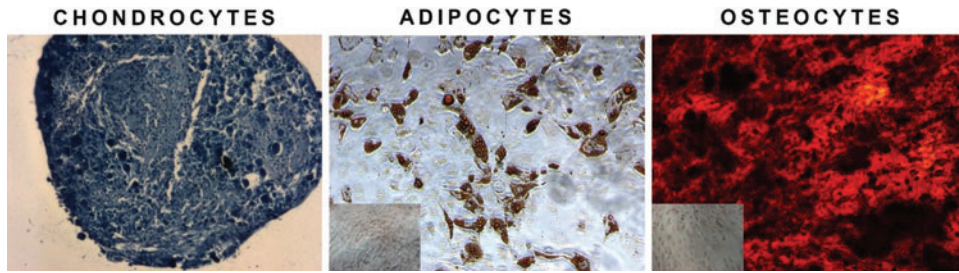

**Supplementary Figure S4.** Representative images of ASCs differentiated into chondrocytes (Alcian blue staining to visualize glycosaminoglycan secretion), adipocytes (cellular accumulation of lipids estimated by Oil red O staining), and osteocytes (calcium deposition detected by Alizarin red staining). ASCs, adipose-derived stem cells.

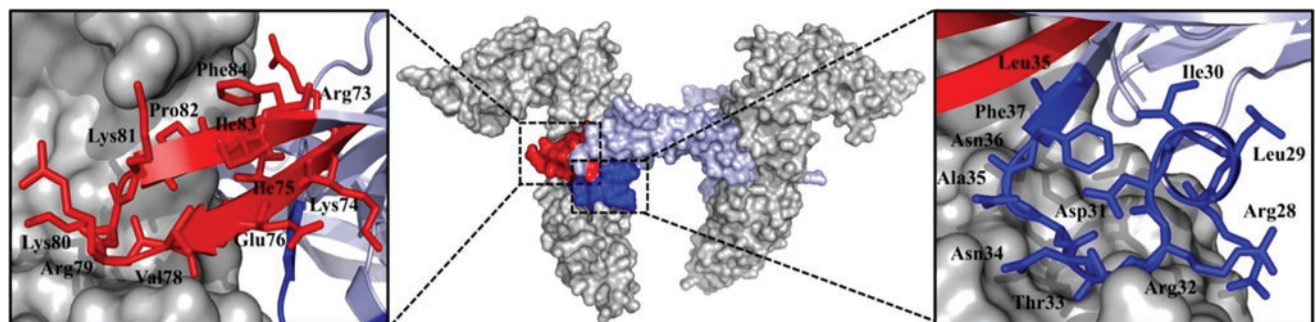

**Supplementary Figure S5.** Surface representation of the PDGF-BB:PDGFR $\beta$  complex structure derived from the X-ray crystallography structure (PDB code: 3MJG). The fragment of the PDGF-BB loop L1 is colored *blue*, and the fragment of loop L3 is colored *red*. On the *right* is a close-up view of loop L1 as a cartoon/stick representation with the labeled residues corresponding to the sequence of the Pdgf1 peptide, and on the *left* is loop L3 shown as a cartoon/stick representation with the labeled residues corresponding to the sequence of the Pdgf1 peptide. 3D structures were derived from the X-ray crystallography structure with the PDB code 3MJG. PDGF, platelet-derived growth factor.
