# Supplementary material
Source: PubMed Central journal article supplement (PMC7698658)
Supplement: Supp_FigS6-S7.pdf [file Supp_FigS6-S7.pdf]

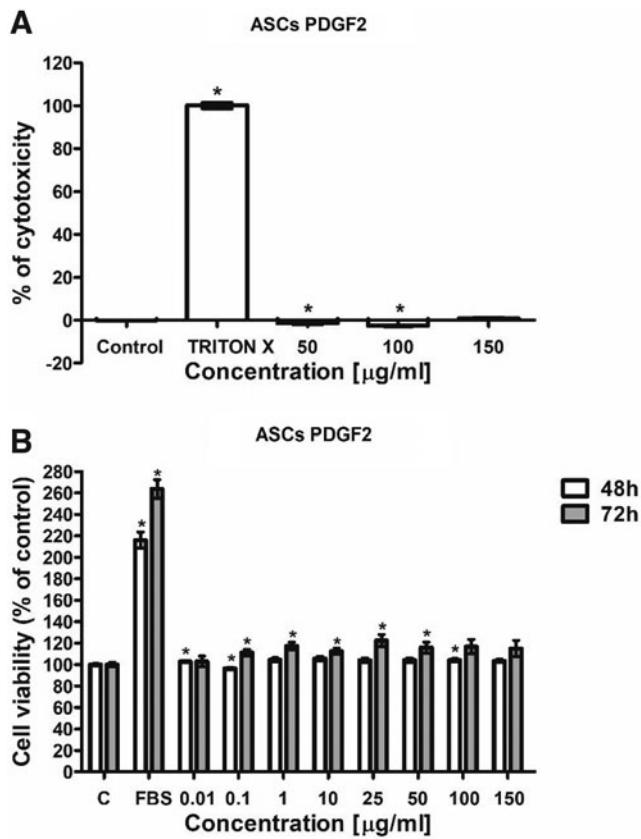

**Supplementary Figure S6.** PDGF2 cytotoxicity in ASCs (A) and the effect of PDGF2 on ASC proliferation (B). Graphs show the results of three independent experiments, which are presented as the mean  $\pm$  SEM (\*statistically significant difference, Mann-Whitney *U*-test,  $p < 0.05$ ).

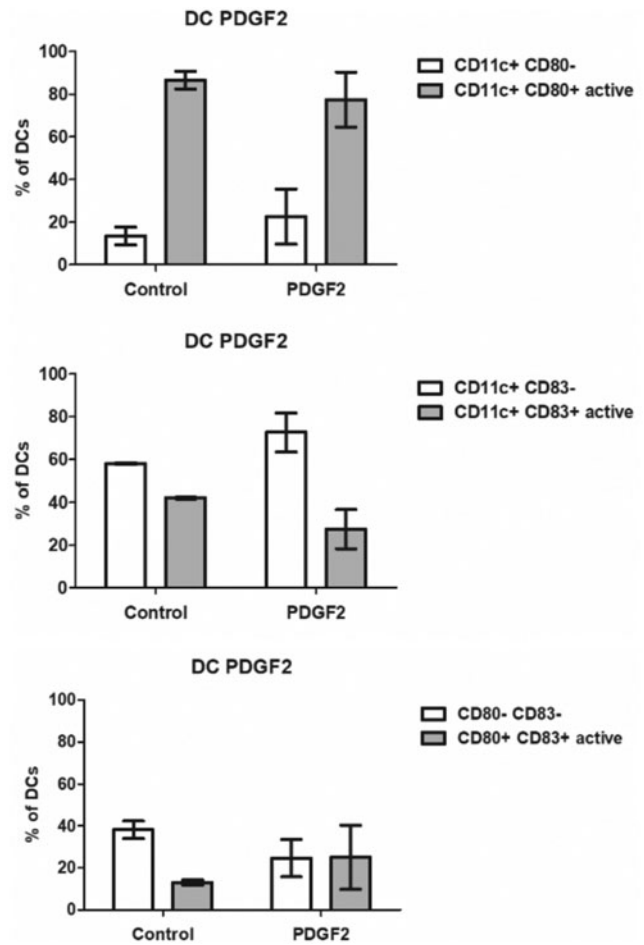

**Supplementary Figure S7.** Activation of dendritic cells after an incubation with PDGF2. Graphs show the results of two independent experiments, which are presented as the mean  $\pm$  SEM.
