# Supplementary material
Source: PubMed Central journal article supplement (PMC7698658)
Supplement: Supp_FigS8.pdf [file Supp_FigS8.pdf]

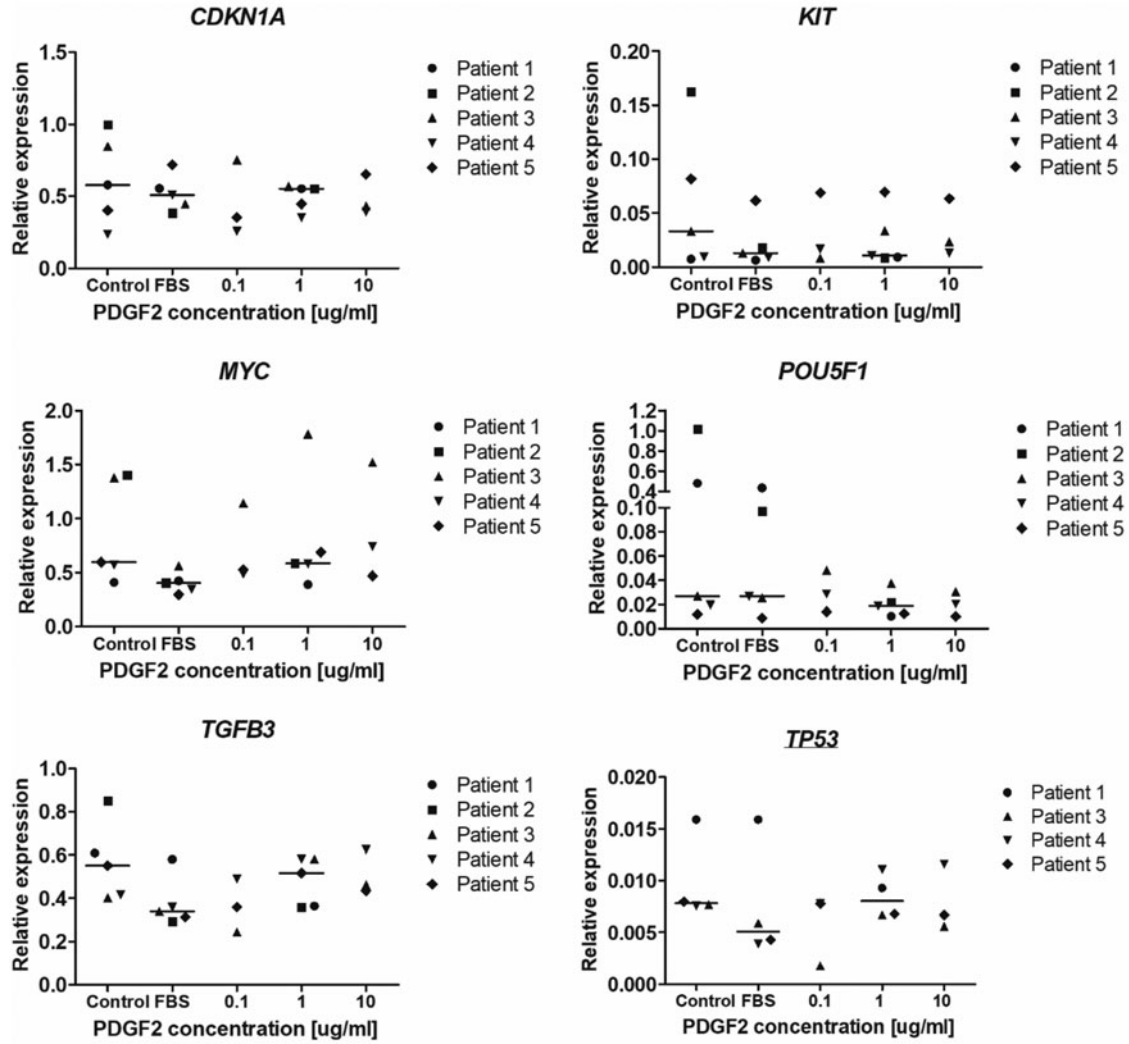

**Supplementary Figure S8.** Transcriptional responses of primary keratinocytes to PDGF2. Different data markers correspond to different patients; the horizontal lines indicate the median values.
