# Supplementary material
Source: PubMed Central journal article supplement (PMC7698658)
Supplement: Supp_FigS9-TableS1-S2.pdf [file Supp_FigS9-TableS1-S2.pdf]

>PDGF1\_peptide

**KIEIVRKKPIF**

>PDGF2\_peptide

**LIDRTNANFL**

>Human\_PDGFNP\_002599.1

MNRCWALFLSLCCYLRLVSAEGDPIPEELYEMLSDHSIRSFDDLQRLRHGDPGEEDGAELDLNMTRSHSG  
GELESLARGRRSLGSLTIAEPAMIAECKTRTEVFQISRRLIDRTNANFLVWPPCVEVQRCSGCCNNRNVQ  
CRPTQVQLRPVQVRKIEIVRKKPIFKKATVTLEDHLACKCETVAAARPVTRSPGGSQEQRAKTPQTRVTI  
RTVRRRPPKPKHRKFKHDKTALKETLGA

>Mouse\_PDGFNP\_035187.2

MNRCWALFLPLCCYLRLVSAEGDPIPEELYEMLSDHSIRSFDDLQRLRHRSVDEDGAELDLNMTRAHSG  
VELESSSRGRRSLGSLAAAEPAVIAECKTRTEVFQISRNLIDRTNANFLVWPPCVEVQRCSGCCNNRNVQ  
CRASQVQMRPVQVRKIEIVRKKPIFKKATVTLEDHLACKCETVVTPRPVTRSPGTSREQRAKTPQARVTI  
RTVRIIRPPKPKHRKFKHDKAALKETLGA

Human\_PDGFNP\_002599.1 MNRCWALFLsLCCYLRLVSAEGDPIPEELYEMLSDHSIRSFDDLQRLRHgDpgEEDGAEL  
PDGF1\_peptide -----  
Mouse\_Pdgfb MNRCWALFLpLCCYLRLVSAEGDPIPEELYEMLSDHSIRSFDDLQRLRHrDsvDEDGAEL  
PDGF2\_peptide -----

Human\_PDGFNP\_002599.1 DLNMTRSHSGgELES1ARGRRSLGSLtiAEPAMIAECKTRTEVFQISRrLIDRTNANFLV  
PDGF1\_peptide -----  
Mouse\_Pdgfb DLNMTRAHSGvELESsSRGRRSLGSLaaAEPAVIAECKTRTEVFQISRnLIDRTNANFLV  
PDGF2\_peptide -----LIDRTNANFLI-----

Human\_PDGFNP\_002599.1 WPPCVEVQRCSGCCNNRNVQCRpTQVQLRPVQVRKIEIVRKKPIFKKATVTLEDHLACKC  
PDGF1\_peptide -----KIEIVRKKPIF-----  
Mouse\_Pdgfb WPPCVEVQRCSGCCNNRNVQCRaSQVQMRPVQVRKIEIVRKKPIFKKATVTLEDHLACKC  
PDGF2\_peptide -----

Human\_PDGFNP\_002599.1 ETVaaaRPVTRSPGgSQEQRAKTPQtRVTIRTVRRRPPKPKHRKFKHDKtALKETLGA  
PDGF1\_peptide -----  
Mouse\_Pdgfb ETVvtpRPVTRSPGtSREQRAKTPQaRVTIRTVRIIRPPKPKHRKFKHDKaALKETLGA  
PDGF2\_peptide -----

Human\_PDGFNP\_002599.1 A  
PDGF1\_peptide -  
Mouse\_Pdgfb A  
PDGF2\_peptide -

**Supplementary Figure S9.** Sequence alignment of mouse and human PDGFB proteins and the PDGF1 and PDGF2 peptides. The sequence alignment was carried out using the MUSCLE program.<sup>S1</sup>

**Supplementary Table S1.** High-performance liquid chromatography analysis of compounds

| Compound  | Retention Time (min) | Purity (%) |
|-----------|----------------------|------------|
| PDGF1     | 4.47                 | 97.8       |
| PDGF2     | 4.76                 | 98.2       |
| PDGF2-HTT | 5.57                 | 98.6       |

The purity of the peptides was verified by analytical UPLC with Nexera X2 (Schimadzu) on the C8 Kinetex 2.6  $\mu$ m 100 Å column (2.1  $\times$  100 mm; Phenomenex). The following eluents were used: A=0.1% TFA in water and B=0.1% TFA and 80% ACN in H<sub>2</sub>O. The flow rate was 0.5 mL/min, and UV detection at  $\lambda$ =223 nm was performed. A linear gradient of 5  $\rightarrow$  100% B over 15 min was used. The percentage purity of peptides was determined as the % of area under the peak.

ACN, acetonitrile; HTT, head-to-tail cyclization methodology; PDGF, platelet-derived growth factor; TFA, trifluoroacetic acid.

**Supplementary Table S2.** Quantitative PCR primers

| Gene   | Forward/Reverse | Sequence               |
|--------|-----------------|------------------------|
| ACTB   | Forward         | CATGGGTCAGAAGGATTCT    |
| ACTB   | Reverse         | ACACGCAGCTCATTGTAGAA   |
| CDKN1A | Forward         | CTGGCACCTCACCTGCTCTG   |
| CDKN1A | Reverse         | CGGATTAGGCTTCCTCTTGG   |
| MYC    | Forward         | ATAGCAGCGGGCGGGCA      |
| MYC    | Reverse         | CGAGGTCATAGTTCCTGTGGT  |
| POU5F1 | Forward         | TCAGCCACATCGCCCA       |
| POU5F1 | Reverse         | AGACCCAGCAGCCTCAA      |
| TBP    | Forward         | TCCACAGTAATCTTGGTTGTA  |
| TBP    | Reverse         | CACCATTTTCCCAGAACTGA   |
| TGFB3  | Forward         | CGTGAGTGGCTGTTGAGAAG   |
| TGFB3  | Reverse         | GATTAGATGAGGTTGTGGTGA  |
| TP53   | Forward         | GCTTTGAGGTGCGTGTGGT    |
| TP53   | Reverse         | AGTGGTTCTCTTTGGCTGGG   |
| KIT    | Forward         | CTGCGTTCTGCTCCTACTGCTT |
| KIT    | Reverse         | CCTGGATGGATGGATGGT     |
