# Supplementary material
Source: PubMed Central journal article supplement (PMC7698658)
Supplement: Supp_TableS3-S4.pdf [file Supp_TableS3-S4.pdf]

**Supplementary Table S3.** Diseases and functions predicted to be influenced in adipose-derived stem cells originating from three patients after RNA pooling and stimulation with PDGF2 (1 µg/mL) compared with parallel controls untreated with PDGF2

| Diseases and Function Annotation         | p        | Predicted Activation State | z-Score | Number of Molecules Involved in the Process |
|------------------------------------------|----------|----------------------------|---------|---------------------------------------------|
| Invasion of cells                        | 7.01E-08 | Increased                  | 2.520   | 77                                          |
| Cell cycle progression                   | 1.55E-05 | Increased                  | 2.498   | 62                                          |
| Proliferation of epithelial cell lines   | 1.84E-05 | Increased                  | 2.336   | 30                                          |
| Binding of professional phagocytic cells | 8.97E-07 | Decreased                  | -2.001  | 22                                          |
| Flux of cation                           | 1.19E-06 | Decreased                  | -2.037  | 26                                          |
| Cell viability of lymphocytes            | 1.61E-04 | Decreased                  | -2.051  | 10                                          |
| Cell movement of lymphocytes             | 5.72E-07 | Decreased                  | -2.103  | 30                                          |
| Cell movement of phagocytes              | 1.51E-04 | Decreased                  | -2.104  | 31                                          |
| Binding of blood cells                   | 2.60E-12 | Decreased                  | -2.107  | 49                                          |
| Migration of mononuclear leukocytes      | 7.85E-09 | Decreased                  | -2.118  | 35                                          |
| Cell death of cancer cells               | 1.13E-04 | Decreased                  | -2.128  | 26                                          |
| Lymphocyte migration                     | 1.38E-07 | Decreased                  | -2.141  | 29                                          |
| Lymphopoiesis                            | 1.08E-05 | Decreased                  | -2.151  | 22                                          |
| Flux of ion                              | 2.17E-07 | Decreased                  | -2.164  | 28                                          |
| Cellular homeostasis                     | 1.51E-05 | Decreased                  | -2.214  | 82                                          |
| Flux of Ca <sup>2+</sup>                 | 1.25E-05 | Decreased                  | -2.342  | 23                                          |
| Lymphohematopoietic neoplasia            | 1.49E-14 | Decreased                  | -2.345  | 319                                         |
| Hematological neoplasia                  | 3.76E-14 | Decreased                  | -2.345  | 319                                         |
| Cell movement of mononuclear leukocytes  | 7.26E-07 | Decreased                  | -2.485  | 38                                          |
| Cell movement of T lymphocytes           | 4.67E-05 | Decreased                  | -2.486  | 18                                          |
| T cell migration                         | 6.95E-05 | Decreased                  | -2.522  | 19                                          |
| Binding of mononuclear leukocytes        | 1.08E-07 | Decreased                  | -2.563  | 25                                          |
| Mobilization of Ca <sup>2+</sup>         | 1.96E-06 | Decreased                  | -2.944  | 30                                          |

The z-score is an algorithm in the IPA software designed to reduce the chance that random data will produce a significant prediction. It identifies functions with the strongest prediction for an increase (positive z-score) or a decrease (negative z-score). p-Score values <0.05 and z-score values ≤-2 or ≥2 were considered significant.

IPA, Ingenuity Pathway Analysis.

**Supplementary Table S4.** Diseases and functions predicted to be influenced in fibroblasts originating from three patients after RNA pooling and stimulation with PDGF2 (1 µg/mL) compared with parallel controls untreated with PDGF2

| Diseases and Function Annotation | p        | Predicted Activation State | z-Score | Number of Molecules Involved in the Process |
|----------------------------------|----------|----------------------------|---------|---------------------------------------------|
| Cell movements                   | 2.83E-03 | Increased                  | 3.742   | 76                                          |
| Cell migration                   | 1.53E-03 | Increased                  | 3.445   | 70                                          |
| L-Tyrosine phosphorylation       | 3.11E-02 | Increased                  | 2.449   | 8                                           |
| Stem cell migration              | 4.20E-04 | Increased                  | 2.176   | 5                                           |
| Invasion of cells                | 1.36E-02 | Increased                  | 2.073   | 40                                          |
| Apoptosis                        | 1.57E-03 | Decreased                  | -2.016  | 88                                          |

The z-score is an algorithm in the IPA software designed to reduce the chance that random data will produce a significant prediction. It identifies functions with the strongest prediction for an increase (positive z-score) or a decrease (negative z-score). p-Score values <0.05 and z-score values ≤-2 or ≥2 were considered significant.
