# Supplementary material
Source: PubMed Central journal article supplement (PMC7698658)
Supplement: Supp_TableS5.pdf [file Supp_TableS5.pdf]

**Supplementary Table S5.** The results of a TOX analysis in Ingenuity Pathway Analysis carried out for the complete transcriptome of adipose-derived stem cells treated with PDGF2 ( $p \leq 0.05$ ) in comparison to that of parallel controls untreated with PDGF2

Categories: Cancer, Hematological Disease, Organismal Injury and Abnormalities Cancer, Cellular Development, Cellular Growth and Proliferation, Organismal Injury and Abnormalities, Tumor Morphology

| Diseases or Functions Annotation     | p        | Predicted Activation State | z-Score | Number of Molecules Involved in the Process |
|--------------------------------------|----------|----------------------------|---------|---------------------------------------------|
| Lymphohematopoietic neoplasia        | 5.90E-17 | Decreased                  | -2.121  | 376                                         |
| Hematopoietic neoplasm               | 2.65E-16 | Decreased                  | -2.121  | 372                                         |
| Cancer                               | 4.82E-16 |                            | -1.732  | 1118                                        |
| Solid tumor                          | 1.11E-16 |                            | -0.487  | 1121                                        |
| Growth of malignant tumor            | 1.35E-06 |                            | -0.472  | 30                                          |
| Nonhematological solid tumor         | 3.06E-17 |                            | -0.411  | 1106                                        |
| Melanoma                             | 2.83E-39 |                            | -0.398  | 823                                         |
| Malignant solid tumor                | 5.47E-17 |                            | -0.350  | 1117                                        |
| Connective or soft tissue tumor      | 2.34E-06 |                            | -0.257  | 168                                         |
| Proliferation of sarcoma cells       | 8.52E-06 |                            | -0.257  | 11                                          |
| Proliferation of cancer cells        | 4.24E-06 |                            | -0.238  | 28                                          |
| Cancer of cells                      | 1.61E-34 |                            | -0.152  | 547                                         |
| Advanced malignant tumor             | 2.19E-11 |                            | -0.152  | 117                                         |
| Secondary tumor                      | 1.70E-08 |                            | -0.152  | 95                                          |
| Nonmelanoma solid tumor              | 9.61E-19 |                            | -0.118  | 1102                                        |
| Nervous system neoplasm              | 7.67E-11 |                            | -0.077  | 180                                         |
| Development of neuroepithelial tumor | 8.50E-10 |                            | -0.077  | 151                                         |
| Glioma                               | 2.16E-09 |                            | -0.077  | 149                                         |
| Central nervous system solid tumor   | 6.38E-09 |                            | -0.077  | 166                                         |
| Breast or colorectal cancer          | 3.47E-22 |                            | 0.000   | 670                                         |
| Nonhematological malignant neoplasm  | 6.25E-17 |                            | 0.121   | 1103                                        |
| Abdominal cancer                     | 4.76E-25 |                            | 0.152   | 1059                                        |
| Liver lesion                         | 7.56E-18 |                            | 0.197   | 577                                         |
| Proliferation of tumor cells         | 2.62E-06 |                            | 0.349   | 31                                          |
| Genitourinary tumor                  | 4.06E-30 |                            | 0.539   | 831                                         |
| Abdominal neoplasm                   | 4.07E-24 |                            | 0.555   | 1067                                        |
| Mammary tumor                        | 1.91E-15 |                            | 0.600   | 301                                         |
| Growth of tumor                      | 9.06E-07 |                            | 0.657   | 35                                          |
| Extracranial solid tumor             | 1.13E-15 |                            | 0.661   | 1114                                        |
| Neoplasia of cells                   | 5.41E-34 |                            | 0.764   | 553                                         |
| Incidence of tumor                   | 2.24E-29 |                            | 0.896   | 827                                         |
| Frequency of tumor                   | 1.06E-23 |                            | 0.896   | 788                                         |
| Development of malignant tumor       | 1.16E-22 |                            | 0.896   | 778                                         |
| Epithelial neoplasm                  | 1.09E-18 |                            | 0.970   | 1096                                        |
| Carcinoma                            | 3.31E-18 |                            | 0.970   | 1094                                        |
| Tumorigenesis of tissue              | 7.82E-18 |                            | 0.970   | 1097                                        |

Category: Cell Death and Survival

|                                      |          |  |        |     |
|--------------------------------------|----------|--|--------|-----|
| Cell death of immune cells           | 5.48E-09 |  | -1.861 | 48  |
| Necrosis                             | 2.27E-19 |  | -1.474 | 268 |
| Apoptosis                            | 7.87E-17 |  | -1.297 | 246 |
| Apoptosis of tumor cell lines        | 1.43E-11 |  | -1.218 | 169 |
| Cell death of tumor cell lines       | 5.27E-12 |  | -0.586 | 205 |
| Apoptosis of leukocytes              | 2.12E-07 |  | -0.006 | 33  |
| Apoptosis of lymphocytes             | 1.63E-06 |  | 0.347  | 23  |
| Cell death of mononuclear leukocytes | 8.95E-07 |  | 0.352  | 28  |
| Cell death of lymphocytes            | 1.61E-06 |  | 0.372  | 26  |
| Apoptosis of mononuclear leukocytes  | 8.27E-07 |  | 0.374  | 25  |
| Cell survival                        | 2.30E-06 |  | 1.161  | 135 |
| Cell viability                       | 1.54E-06 |  | 1.176  | 132 |

The z-score is an algorithm in the IPA software designed to reduce the chance that random data will produce a significant prediction. It identifies functions with the strongest prediction for an increase (positive z-score) or a decrease (negative z-score).  $p$ -Score values  $<0.05$  and z-score values  $\leq -2$  or  $\geq 2$  were considered significant.

TOX, toxicity analysis.
