# Supplementary material
Source: PubMed Central journal article supplement (PMC7698658)
Supplement: Supp_TableS6.pdf [file Supp_TableS6.pdf]

**Supplementary Table S6.** The results of a TOX analysis in Ingenuity Pathway Analysis carried out for the complete transcriptome of fibroblasts treated with PDGF2 ( $p \leq 0.05$ ) in comparison to that of parallel controls untreated with PDGF2

Categories: Cancer, Organismal Injury and Abnormalities Cancer, Cellular Development, Cellular Growth and Proliferation, Organismal Injury and Abnormalities, Tumor Morphology

| Diseases or Functions Annotation         | p        | Predicted Activation State | Activation z-Score | Number of Molecules Involved in the Process |
|------------------------------------------|----------|----------------------------|--------------------|---------------------------------------------|
| Cancer                                   | 3.64E-05 |                            | -1.207             | 754                                         |
| Malignant solid tumor                    | 8.78E-05 |                            | -0.557             | 750                                         |
| Nonhematological malignant neoplasm      | 3.52E-06 |                            | -0.492             | 744                                         |
| Nonmelanoma solid tumor                  | 1.89E-05 |                            | -0.445             | 737                                         |
| Nonhematological solid tumor             | 5.95E-06 |                            | -0.436             | 745                                         |
| Extracranial solid tumor                 | 9.78E-04 |                            | -0.391             | 745                                         |
| Solid tumor                              | 2.63E-04 |                            | -0.274             | 752                                         |
| Cytotoxic reaction of tumor cell lines   | 2.27E-02 |                            | 0.555              | 5                                           |
| Colony formation of tumor cells          | 1.86E-02 |                            | 0.000              | 4                                           |
| Solid tumor                              | 2.63E-04 |                            | -0.274             | 752                                         |
| Extracranial solid tumor                 | 9.78E-04 |                            | -0.391             | 745                                         |
| Nonhematological solid tumor             | 5.95E-06 |                            | -0.436             | 745                                         |
| Nonmelanoma solid tumor                  | 1.89E-05 |                            | -0.445             | 737                                         |
| Nonhematological malignant neoplasm      | 3.52E-06 |                            | -0.492             | 744                                         |
| Malignant solid tumor                    | 8.78E-05 |                            | -0.557             | 750                                         |
| Cancer                                   | 3.64E-05 |                            | -1.207             | 754                                         |
| <i>Category: Cell Death and Survival</i> |          |                            |                    |                                             |
| Cell death of tumor cell lines           | 3.16E-02 |                            | 0.821              | 106                                         |
| Apoptosis of tumor cell lines            | 7.94E-03 |                            | 0.553              | 90                                          |
| Necrosis                                 | 1.16E-02 |                            | 0.259              | 132                                         |
| Apoptosis                                | 2.67E-03 |                            | -0.485             | 129                                         |

The z-score is an algorithm in the IPA software designed to reduce the chance that random data will produce a significant prediction. It identifies functions with the strongest prediction for an increase (positive z-score) or a decrease (negative z-score).  $p$ -Score values  $<0.05$  and z-score values  $\leq -2$  or  $\geq 2$  were considered significant.

## SUPPLEMENTARY REFERENCE

S1. Edgar RC. MUSCLE: multiple sequence alignment with high accuracy and high throughput. *Nucleic Acids Res* 2004;32:1792–1797.
